# Supplementary material for: Gene and lncRNA Profiling of ω3/ω6 Polyunsaturated Fatty Acid-Exposed Human Visceral Adipocytes Uncovers Different Responses in Healthy Lean, Obese and Colorectal Cancer-Affected Individuals
Source: MDPI journal article supplement (doi:10.3390/ijms25063357), 2024-03-15
Supplement: s1 [file s1]

**Supplemental Data S1.** qPCR analysis of 6 randomly chosen genes affected in NW individuals by PUFA treatments. Results are expressed as the fold change (FC) with respect to the corresponding untreated control. p-values  $\leq 0.05$  are in bold; Cells colored in light red or blue indicate the concordance with up- or down-regulation in RNASeq data, respectively.

| Gene   | NW-AA |              | NW-DHA |               | OB-AA |              | OB-DHA |              | CRC-AA |              | CRC-DHA |              |
|--------|-------|--------------|--------|---------------|-------|--------------|--------|--------------|--------|--------------|---------|--------------|
|        | FC    | p-value      | FC     | p-value       | FC    | p-value      | FC     | p-value      | FC     | p-value      | FC      | p-value      |
| ACTB   | 1.92  | <b>0.042</b> | 2.17   | 0.095         | 3.24  | 0.934        | 0.51   | 0.130        | 1.95   | 0.186        | 0.96    | 0.517        |
| CAST   | 2.01  | <b>0.002</b> | 1.84   | 0.110         | 1.67  | <b>0.007</b> | 1.10   | 0.916        | 1.30   | 0.374        | 1.20    | 0.882        |
| DDR1   | 1.42  | 0.206        | 1.56   | <b>0.017</b>  | 0.60  | 0.333        | 0.55   | <b>0.007</b> | 1.79   | 0.397        | 1.38    | 0.725        |
| FAT1   | 1.58  | <b>0.001</b> | 1.55   | <b>0.019</b>  | 1.71  | 0.148        | 0.79   | 0.270        | 1.92   | 0.392        | 1.52    | 0.754        |
| LIPE   | 0.39  | <b>0.002</b> | 0.50   | <b>0.009</b>  | 2.30  | 0.977        | 1.13   | 0.627        | 0.56   | <b>0.022</b> | 0.39    | <b>0.045</b> |
| SLC2A5 | 6.58  | <b>0.005</b> | 7.02   | <b>0.0014</b> | 1.85  | 0.82         | 0.74   | 0.331        | 9.04   | 0.066        | 6.08    | 0.058        |

**Supplemental Data S3.** Anthropometric characteristics of subjects included in the study. Data are mean  $\pm$ Standard Error. BMI, body mass index.

|                          | Lean           | Obese            | Cancer         |
|--------------------------|----------------|------------------|----------------|
| N (Male/Female)          | 3 (0M, 3F)     | 3 (2M, 1F)       | 3 (2M, 1F)     |
| Age (years)              | 36,3 $\pm$ 4,4 | 44,7 $\pm$ 8,8   | 57,7 $\pm$ 4,7 |
| Body weight (Kg)         | 60,3 $\pm$ 5,7 | 104,3 $\pm$ 33,5 | 70 $\pm$ 12,2  |
| BMI (Kg/m <sup>2</sup> ) | 23 $\pm$ 1,4   | 35,2 $\pm$ 5     | 23,3 $\pm$ 1,4 |

**Supplemental Data S4:** List of genes and probes selected for real time qPCR analysis.

| Gene Symbol | Gene Name                                   | Assay ID      |
|-------------|---------------------------------------------|---------------|
| ACTB        | actin b                                     | Hs99999903_m1 |
| CAST        | calpastatin                                 | Hs00156280_m1 |
| DDR1        | discoidin domain receptor tyrosine kinase 1 | Hs01058430_m1 |
| FAT1        | FAT atypical cadherin 1                     | Hs00170627_m1 |
| LIPE        | lipase E, hormone sensitive type            | Hs00943410_m1 |
| SLC2A5      | solute carrier family 2 member 5            | Hs01086390_m1 |
